# Supplementary material for: Ontogenetic shifts in sex ratios support multiple adaptive explanations for temperature-dependent sex determination
Source: Research Square preprint supplement (doi:10.21203/rs.3.rs-3569199/v1), 2023-11-14
Supplement: Supplementary file 1 [file 2ee0eb51c2cae305fb5349bc.docx]

Terebiznik and Rollinson Code

2023-11-06

Set up:

# Load in packages
library(readr)
library(MCMCglmm)
library(tidyverse)
library(MuMIn)

# Load in sex ratio data
ultimate_full <- read_csv("final_UltimateData.csv")
ultimate <- filter(ultimate_full, Life.Stage %in% c("birth.sex.ratio", "adult.sex.ratio"))

# Load in phylogeny data
phylo=read.tree("final_tree.phy")
inv.phylo = inverseA(phylo, nodes="ALL", scale=TRUE)

Creating Binary Dataset

# Function to convert dataset into binary format

binary_ultimate <- function(data){

 # filter data so it only contains values with sex ratio (double check)
 temp <- filter(data, !is.na(Sex.Ratio))

 # create phylo column that is identical to species column (need for model)
 temp2 <- mutate(temp, phylo = species)

 # get column for number of males and females, remove those w/o sample size
 temp3 <- temp2 %>%
 mutate(Nmales = round(Sex.Ratio * N)) %>%
 mutate(Nfemales = round((1-Sex.Ratio)*N))
 temp4 <- filter(temp3, !is.na(N))

 # create empty data frame to fill in
 binary_data <- data.frame()

 # for each row in data; convert to binary
 for(i in 1:nrow(temp4)){
 row_fill <- temp4[i, ] # get basic information
 row_fillM <- cbind(row_fill, Sex = c(1)) # fill in with column added if male
 row_fillF <- cbind(row_fill, Sex = c(0)) # fill in with column added if female

 # Get number of each sex reported
 NMales <- temp4[i, "Nmales"] # number of males (rows needed)
 NFemales <- temp4[i, "Nfemales"] # number of females(rows needed)

 # Create new data frame
 df <- rbind(row_fillM, row_fillF) # get data frame with both ones

 # Contingency in case a population is reported as 100% male or female
 if(NMales == 0|NFemales == 0){
 # If males are 0
 if(NMales == 0){ # remove male row if no males in this population reported
 df <- df[-1, ]
 df_temporary <- as.data.frame(lapply(df, rep, NFemales))
 }

 # If Females are 0
 if(NFemales == 0){df <- df[-2,]
 df_temporary <- as.data.frame(lapply(df, rep, NMales))
 } # remove if no females in this population reported
 }
 # Create temporary data set with replicated number of males and females
 else{df_temporary <- as.data.frame(lapply(df, rep, c(NMales, NFemales)))}

 # Add to total data frame
 binary_data <- rbind(binary_data, df_temporary)

 }
 # fix population id column name
 names(binary_data)[names(binary_data) == '?..population.ID'] <- 'population.ID'

 # return data
 return(binary_data)

}

# Making data into binary format
df_binary <- binary_ultimate(ultimate) # to use in series 1 of models of just birth vs adults
df_binary_full <- binary_ultimate(ultimate_full)# to use in model 2 of best of series of model 1

Models:

##### Model 1.1 Single Mechanism Hypothesis
# prior
prior_SDM <- list(G = list(G1 = list(V =1, nu = 0.02), G2 = list(V = 1, nu = 0.02)), R = list (V = 1, fix = 1))

#model
model1.1<- MCMCglmm(Sex ~ Life.Stage * sex.determination , random=~sex.determination:species +
 species:population.ID, rcov=~sex.determination:units, family="categorical",
 ginverse=list(phylo=inv.phylo$Ainv), prior=prior_SDM, data=df_binary,
 nitt=50000, burnin=300, thin=50, verbose=F)


##### Model 1.2 Evolutionary History Hypothesis
# prior
prior_phylo <- list(G = list(G1 = list(V =1, nu = 0.02), G2 = list(V = 1, nu = 0.02)), R = list (V = 1, fix = 1))

# model
model1.2 <- MCMCglmm(Sex ~ Life.Stage * SuperTaxa * sex.determination , random= ~SuperTaxa:species +
 species:population.ID, rcov=~SuperTaxa:units, family="categorical",
 ginverse=list(phylo=inv.phylo$Ainv), prior=prior_phylo, data=df_binary,
 nitt=50000, burnin=3000, thin=50, verbose=F)


##### Model 1.3 Life History Hypothesis
#prior
prior_LH <- list(G = list(G1 = list(V =1, nu = 0.02), G2 = list(V = 1, nu = 0.02)), R = list (V = 1, fix = 1))

# model
model1.3 <- MCMCglmm(Sex ~ Life.Stage * LifeHistory * sex.determination , random=~LifeHistory:species +
 species:population.ID, rcov=~LifeHistory:units, family="categorical",
 ginverse=list(phylo=inv.phylo$Ainv), prior=prior_LH, data=df_binary,
 nitt=50000, burnin=3000, thin=50, verbose=F)


##### Model 1.4 Sex Determining Mechanism Hypothesis
# prior
prior_TSDtype<- list(G = list(G1 = list(V =1, nu = 0.02), G2=list(V= 1,nu=0.02)), R = list (V = 1, fix = 1))

# model
model1.4 <- MCMCglmm(Sex ~ Life.Stage * SDM.Type, random=~SDM.Type:species + species:population.ID,
 rcov=~SDM.Type:units, family="categorical", ginverse=list(phylo=inv.phylo$Ainv),
 prior=prior_TSDtype, data=df_binary,nitt=50000, burnin=3000, thin=50, verbose=F)

Identifying Best Model:

# Best fit model with DIC
output <- model.sel(model1.1, model1.2, model1.3, model1.4, rank = "DIC")
output # model1.4 is best

# running model 4 with juvenile data
model2.1 <- MCMCglmm(Sex ~ Life.Stage * SDM.Type, random=~SDM.Type:species + species:population.ID,
 rcov=~SDM.Type:units, family="categorical", ginverse=list(phylo=inv.phylo$Ainv),
 prior=prior_TSDtype, data=df_binary_full,nitt=50000, burnin=3000, thin=50, verbose=F)
