# Supplementary material for: Ontogenetic shifts in sex ratios support multiple adaptive explanations for temperature-dependent sex determination
Source: Research Square preprint supplement (doi:10.21203/rs.3.rs-3569199/v1), 2023-11-14
Supplement: Supplementary file 2 [file a83a1a49a6e92e5f680fcd38.docx]

**Ontogenetic shifts in sex ratio supports a simple explanation for the evolution of temperature-dependent sex determination in reptiles**

Mariel Terebiznik1*, Maxwell Farrell1, Njal Rollinson1,2

1Department of Ecology and Evolutionary Biology, University of Toronto, Toronto, Ontario, Canada, M5S 3B2

2School of the Environment, University of Toronto, Toronto, Ontario, Canada, M5S 3E8

*Corresponding author: mariel.terebiznik@mail.utoronto.ca (ORCID: 0002-9299-1184)

**Supplementary Tables and Figures**

**Table S1**. Number of sex ratio records (NSex Ratio) and number of individuals (NIndividual) total for the hatching, juvenile, and adult life stages for each group being tested in the models for each of the four hypotheses.

| **Single Mechanistic Hypothesis** | | | | |
| --- | --- | --- | --- | --- |
| Group | Life Stage | | NSex Ratio | NIndividual |
| TSD | Hatching | | 101 | 48363 |
| Juvenile | | 46 | 19616 |
| Adult | | 316 | 70490 |
| GSD | Hatching | | 53 | 13924 |
| Juvenile | | 32 | 6335 |
| Adult | | 142 | 42693 |
| **Evolutionary History Hypothesis** | | | | |
| Group | Life Stage | Sex Determination | NSex Ratio | NIndividual |
| Crocodilian +  Testudine | Hatch | GSD | 12 | 1806 |
| TSD | 93 | 44219 |
| Juvenile | GSD | 0 | 0 |
| TSD | 43 | 19197 |
| Adult | GSD | 16 | 3667 |
| TSD | 301 | 67933 |
| Squamata +  Tuatara | Hatch | GSD | 41 | 12118 |
| TSD | 8 | 4144 |
| Juvenile | GSD | 32 | 6335 |
| TSD | 3 | 419 |
| Adult | GSD | 126 | 39026 |
| TSD | 15 | 2557 |
| **Life History Hypothesis** | | | | |
| Group | Life Stage | Sex Determination | NSex Ratio | NIndividual |
| Crocodilian +  Testudine +  Tuatara  long-lived, late maturing taxa | Hatch | GSD | 12 | 1806 |
| TSD | 94 | 44367 |
| Juvenile | GSD | 0 | 0 |
| TSD | 45 | 19468 |
| Adult | GSD | 16 | 3667 |
| TSD | 305 | 68866 |
| Squamata  short-lived, early maturing taxa | Hatch | GSD | 41 | 12118 |
| TSD | 7 | 3996 |
| Juvenile | GSD | 32 | 6335 |
| TSD | 1 | 148 |
| Adult | GSD | 126 | 39026 |
| TSD | 11 | 1624 |
| **TSD Type Hypothesis** | | | | |
| Group | Life Stage | | NSex Ratio | NIndividual |
| GSD | Hatching | | 53 | 13924 |
| Juvenile | | 32 | 6335 |
| Adult | | 142 | 42693 |
| TSD Ia | Hatching | | 77 | 22482 |
| Juvenile | | 25 | 4415 |
| Adult | | 231 | 54071 |
| TSD Ib | Hatching | | 3 | 177 |
| Juvenile | | 2 | 271 |
| Adult | | 6 | 1186 |
| TSD II | Hatching | | 21 | 25704 |
| Juvenile | | 19 | 14930 |
| Adult | | 79 | 15233 |

**Table S2**. Summary output results of the Single Mechanistic Hypothesis model, showing the point estimate and the 95% credible intervals for each TSD and GSD species at hatching and adult life stage.

| **Sex Determining Mechanism** | **Life Stage** | **Point Estimate** | **95% Credible Interval** |
| --- | --- | --- | --- |
| GSD | Hatching | 0.472 | [0.437, 0.507] |
| Adulthood | 0.528 | [0.499, 0.562] |
| TSD | Hatching | 0.351 | [0.318, 0.385] |
| Adulthood | 0534 | [0.507, 0.564] |

**Table S3.** Summary output results of the Evolutionary History Hypothesis model, showing the point estimate and the 95% credible intervals for each taxa and sex-determining mechanism at hatching and adult life stage.

| **Phylogenetic Group** | **SDM** | **Life Stage** | **Point Estimate** | **95% Credible Interval** |
| --- | --- | --- | --- | --- |
| Crocodilian + Testudines | GSD | Hatching | 0.486 | [0.362, 0.612] |
| Adulthood | 0.550 | [0.439, 0.649] |
| TSD | Hatching | 0.326 | [0.295, 0.360] |
| Adulthood | 0.534 | [0.505, 0.563] |
| Squamata + Tuatara | GSD | Hatching | 0.469 | [0.433, 0.504] |
| Adulthood | 0.524 | [0.493, 0.557] |
| TSD | Hatching | 0.589 | [0.472, 0.697] |
| Adulthood | 0.521 | [0.421, 0.614] |

**Table S4**. Summary output results of the Life History Hypothesis model, showing the point estimate and the 95% credible intervals for each life history group and sex-determining mechanism at hatching and adult life stage.

| **Life History Group** | **SDM** | **Life Stage** | **Point Estimate** | **95% Credible Interval** |
| --- | --- | --- | --- | --- |
| Crocodilian + Testudine + Tuatara | GSD | Hatching | 0.482 | [0.355, 0.596] |
| Adulthood | 0.551 | [0.451, 0.563] |
| TSD | Hatching | 0.333 | [0.300, 0.367] |
| Adulthood | 0.534 | [0.495, 0.557] |
| Squamata | GSD | Hatching | 0.471 | [0.434, 0.509] |
| Adulthood | 0.526 | [0.495, 0.557] |
| TSD | Hatching | 0.640 | [0.508, 0.766] |
| Adulthood | 0.481 | [0.377, 0.596] |

**Table S5**. Summary output results of TSD Type Hypothesis model, showing the point estimate and the 95% credible intervals for each sex determining type at each life stage.

| **Sex Determining Mechanism** | **Life Stage** | **Point Estimate** | **95% Credible Interval** |
| --- | --- | --- | --- |
| GSD | Hatching | 0.473 | [0.439, 0.511] |
| Adulthood | 0.528 | [0.498, 0.563] |
| TSD Ia | Hatching | 0.315 | [0.280, 0.354] |
| Adulthood | 0.538 | [0.504, 0.573] |
| TSD Ib | Hatching | 0.699 | [0.523, 0.855] |
| Adulthood | 0.569 | [0.383, 0.711] |
| TSD II | Hatching | 0.425 | [0.349, 0.496] |
| Adulthood | 0.521 | [0.459, 0.572] |

**Table S6**.Summary output results of TSD Type Hypothesis full model with the entire data set, showing the point estimate and the 95% credible intervals for each sex determining type at each life stage.

| **Sex Determining Mechanism** | **Life Stage** | **Point Estimate** | **Credible Intervals** |
| --- | --- | --- | --- |
| GSD | Hatching | 0.482 | [0.446, 0.511] |
| Juvenile | 0.522 | [0.483, 0.556] |
| Adulthood | 0.526 | [0.495, 0.558] |
| TSD Ia | Hatching | 0.314 | [0.277, 0.346] |
| Juvenile | 0.333 | [0.290, 0.367] |
| Adulthood | 0.538 | [0.505, 0.571] |
| TSD Ib | Hatching | 0.699 | [0.548, 0.870] |
| Juvenile | 0.644 | [0.423, 0.863] |
| Adulthood | 0.569 | [0.406, 0.726] |
| TSD II | Hatching | 0.469 | [0.397, 0.554] |
| Juvenile | 0.666 | [0.629, 0.700] |
| Adulthood | 0.526 | [0.495, 0.558] |

**Table S7**. The sex determining mechanism (SDMs) assigned to each species used in this analysis and its citation (SDM source). The SDMs presented include the one used for the main analysis (SDM) and the corresponding conservative assignment (SDMConservative).

| **Species** | **SDM** | **SDMConservative** | **Sex determination source** |
| --- | --- | --- | --- |
| *Acanthodactylus_erythrurus* | GSD | GSD | species in Tree of Sex |
| *Acritoscincus_duperreyi* | GSD | GSD | species in Tree of Sex; written as *Bassiana duperreyi* |
| *Actinemys_marmorata* | TSD Ia | TSD Ia | species in Tree of Sex |
| *Agama_agama* | TSD II | TSD II | species in Tree of Sex |
| *Agama_impalearis* | TSD II | TSD II | species in Tree of Sex |
| *Agkistrodon_piscivorus* | GSD | GSD | genus or family in Tree of Sex |
| *Aldabrachelys_gigantea* | TSD Ia | TSD Ia | species in Tree of Sex; Written as Aldabrachelys dussumieri in tree of sex data base; written as *Dipsochelys dussemieri* in turtle phylogeny file |
| *Alligator_mississippiensis* | TSD II | TSD II | species in Tree of Sex |
| *Amblyrhynchus_cristatus* | GSD | GSD | genus or family in Tree of Sex |
| *Ameiva_erythrocephala* | GSD | GSD | genus or family in Tree of Sex |
| *Amphibolurus_muricatus* | TSD II | TSD II | species in Tree of Sex |
| *Anolis_angusticeps* | GSD | GSD | genus or family in Tree of Sex |
| *Anolis_carolinensis* | GSD | GSD | species in Tree of Sex |
| *Anolis_cupreus* | GSD | GSD | genus or family in Tree of Sex |
| *Anolis_cybotes* | GSD | GSD | genus or family in Tree of Sex |
| *Anolis_distichus* | GSD | GSD | species in Tree of Sex |
| *Anolis_equestris* | GSD | GSD | genus or family in Tree of Sex |
| *Anolis_garmani* | GSD | GSD | genus or family in Tree of Sex |
| *Anolis_limifrons* | GSD | GSD | genus or family in Tree of Sex |
| *Anolis_lineatopus* | GSD | GSD | genus or family in Tree of Sex |
| *Anolis_mariarum* | GSD | GSD | genus or family in Tree of Sex |
| *Anolis_nebulosus* | GSD | GSD | species in Tree of Sex |
| *Anolis_sagrei* | GSD | GSD | genus or family in Tree of Sex |
| *Anolis_schwartzi* | GSD | GSD | genus or family in Tree of Sex |
| *Apalone_spinifera* | GSD | GSD | Badenhorst_et_al._2013._Chromosome_Research |
| *Basiliscus_vittatus* | GSD | GSD | genus or family in Tree of Sex |
| *Batagur_baska* | TSD Ia | TSD Ia | Moll et al (2015) Conservation Biology of Freshwater turtles and tortoises |
| *Boa_constrictor* | GSD | GSD | genus or family in Tree of Sex |
| *Caiman_crocodilus* | TSD II | TSD II | species in Tree of Sex |
| *Caiman_latirostris* | TSD II | TSD II | species in Tree of Sex |
| *Caiman_yacare* | TSD II | TSD II | Mitchell_et_al._2006._Frontiers_in_Zoology |
| *Caretta_caretta* | TSD Ia | TSD Ia | species in Tree of Sex |
| *Carettochelys_insculpta* | TSD Ia | TSD Ia | species in Tree of Sex |
| *Cerberus_schneiderii* | GSD | GSD | genus or family in Tree of Sex |
| *Chelodina_longicollis* | GSD | GSD | species in Tree of Sex |
| *Chelonia_mydas* | TSD Ia | TSD Ia | species in Tree of Sex |
| *Chelydra_serpentina* | TSD II | TSD II | species in Tree of Sex |
| *Chlamydosaurus_kingii* | TSD II | TSD II | species in Tree of Sex |
| *Christinus_marmoratus* | GSD | GSD | species in Tree of Sex |
| *Chrysemys_picta* | TSD Ia | TSD Ia | species in Tree of Sex |
| *Clemmys_guttata* | TSD Ia | TSD Ia | species in Tree of Sex |
| *Coluber_constrictor* | GSD | GSD | genus or family in Tree of Sex |
| *Crocodylus_acutus* | TSD II | TSD II | Charruaua et al (2017) Salamandra |
| *Crocodylus_intermedius* | TSD II | TSD II | Valenzuela book |
| *Crocodylus_johnstoni* | TSD II | TSD II | species in Tree of Sex |
| *Crocodylus_moreletii* | TSD II | TSD II | species in Tree of Sex |
| *Crocodylus_niloticus* | TSD II | TSD II | species in Tree of Sex |
| *Crotalus_horridus* | GSD | GSD | genus or family in Tree of Sex |
| *Crotalus_viridis* | GSD | GSD | genus or family in Tree of Sex |
| *Ctenosaura_bakeri* | GSD | GSD | genus or family in Tree of Sex |
| *Ctenosaura_melanosterna* | GSD | GSD | genus or family in Tree of Sex |
| *Ctenosaura_oedirhina* | GSD | GSD | genus or family in Tree of Sex |
| *Cyclura_cychlura* | GSD | GSD | genus or family in Tree of Sex |
| *Cyclura_nubila* | GSD | GSD | genus or family in Tree of Sex |
| *Deirochelys_reticularia* | TSD Ia | TSD Ia | species in Tree of Sex |
| *Dermatemys_mawii* | TSD Ia | TSD Ia | species in Tree of Sex |
| *Dermochelys_coriacea* | TSD Ia | TSD Ia | species in Tree of Sex |
| *Drymarchon_couperi* | GSD | GSD | species in Tree of Sex |
| *Elaphe_obsoleta* | GSD | GSD | species in Tree of Sex |
| *Elaphe_quadrivirgata* | GSD | GSD | species in Tree of Sex |
| *Emydocephalus_annulatus* | GSD | GSD | species in Tree of Sex |
| *Emydocephalus_ijimae* | GSD | GSD | genus or family in Tree of Sex |
| *Emydoidea_blandingii* | TSD Ia | TSD Ia | species in Tree of Sex |
| *Emydura_macquarii* | GSD | GSD | species in Tree of Sex |
| *Emys_orbicularis* | TSD Ia | TSD Ia | species in Tree of Sex |
| *Eretmochelys_imbricata* | TSD Ia | TSD Ia | species in Tree of Sex |
| *Erymnochelys_madagascariensis* | TSD Ia | NA | Thépot (2021) Genes; mentions this species has TSD, but not type; given this is Podocnemis species, assuming also TSD Ia in non-conservative SDM.type classification |
| *Eulamprus_heatwolei* | TSD Ib | TSD Ib | species in Tree of Sex |
| *Eulamprus_tympanum* | TSD Ib | TSD Ib | species in Tree of Sex |
| *Gambelia_wislizenii* | GSD | GSD | genus or family in Tree of Sex |
| *Gehyra_variegata* | GSD | GSD | genus or family in Tree of Sex |
| *Geochelone_elephantopus* | TSD Ia | TSD Ia | species in Tree of Sex |
| *Glyptemys_insculpta* | GSD | GSD | species in Tree of Sex |
| *Glyptemys_muhlenbergii* | GSD | GSD | Literman et al (2017) Conservation genetics resources |
| *Gopherus_agassizii* | TSD Ia | TSD Ia | species in Tree of Sex |
| *Gopherus_polyphemus* | TSD Ia | TSD Ia | species in Tree of Sex |
| *Graptemys_barbouri* | TSD Ia | TSD Ia | species in Tree of Sex |
| *Graptemys_geographica* | TSD Ia | TSD Ia | species in Tree of Sex |
| *Graptemys_ouachitensis* | TSD Ia | TSD Ia | species in Tree of Sex |
| *Graptemys_pseudogeographica* | TSD Ia | TSD Ia | species in Tree of Sex |
| *Graptemys_versa* | TSD Ia | TSD Ia | species in Tree of Sex |
| *Grayia_smythii* | GSD | GSD | genus or family in Tree of Sex |
| *Hemidactylus_turcicus* | GSD | GSD | species in Tree of Sex; given in record as *Hemidactylus spp*. |
| *Heteronotia_binoei* | GSD | GSD | species in Tree of Sex; given in record as *Hemidactylus spp*. |
| *Holbrookia_maculata* | GSD | GSD | genus or family in Tree of Sex |
| *Iberolacerta_aranica* | GSD | GSD | species in Tree of Sex; written as *Lacerta aranica* |
| *Iberolacerta_aurelioi* | GSD | GSD | species in Tree of Sex |
| *Intellagama_lesueurii* | TSD II | TSD II | Doody et al (2006) Evolutionary Ecology |
| *Kinixys_erosa* | TSD Ia | NA | genus or family in Tree of Sex |
| *Kinixys_homeana* | TSD Ia | NA | genus or family in Tree of Sex |
| *Kinosternon_baurii* | TSD II | TSD II | species in Tree of Sex |
| *Kinosternon_flavescens* | TSD Ia | TSD Ia | species in Tree of Sex |
| *Kinosternon_leucostomum* | TSD II | TSD II | species in Tree of Sex |
| *Kinosternon_scorpioides* | TSD II | TSD II | species in Tree of Sex |
| *Kinosternon_sonoriense* | TSD Ia | TSD Ia | species in Tree of Sex |
| *Kinosternon_subrubrum* | TSD II | TSD II | species in Tree of Sex |
| *Lacerta_agilis* | GSD | GSD | species in Tree of Sex |
| *Lacerta_monticola* | GSD | GSD | species in Tree of Sex |
| *Lacerta_viridis* | GSD | GSD | species in Tree of Sex |
| *Lacerta_vivipara* | GSD | GSD | species in Tree of Sex |
| *Lapemis_hardwickii* | GSD | GSD | genus or family in Tree of Sex |
| *Lepidochelys_kempii* | TSD Ia | TSD Ia | species in Tree of Sex |
| *Lepidochelys_olivacea* | TSD Ia | TSD Ia | species in Tree of Sex |
| *Liasis_fuscus* | GSD | GSD | genus or family in Tree of Sex |
| *Lygosoma_laterale* | GSD | GSD | species in Tree of Sex; written under *Scincella laterale* |
| *Macrochelys_temminckii* | TSD II | TSD II | species in Tree of Sex |
| *Malaclemys_terrapin* | TSD Ia | TSD Ia | species in Tree of Sex |
| *Mauremys_japonica* | TSD Ia | TSD Ia | species in Tree of Sex |
| *Mauremys_reevesii* | TSD Ia | TSD Ia | species in Tree of Sex |
| *Meroles_anchietae* | GSD | GSD | genus or family in Tree of Sex |
| *Meroles_cuneirostris* | GSD | GSD | species in Tree of Sex |
| *Morelia_viridis* | GSD | GSD | genus or family in Tree of Sex |
| *Natator_depressus* | TSD Ia | TSD Ia | species in Tree of Sex |
| *Natrix_natrix* | GSD | GSD | species in Tree of Sex |
| *Nerodia_rhombifer* | GSD | GSD | genus or family in Tree of Sex |
| *Nerodia_sipedon* | GSD | GSD | genus or family in Tree of Sex |
| *Nerodia_taxispilota* | GSD | GSD | genus or family in Tree of Sex |
| *Niveoscincus_ocellatus* | TSD Ia | NA | species in Tree of Sex |
| *Notechis_scutatus* | GSD | GSD | species in Tree of Sex |
| *Opheodrys_aestivus* | GSD | GSD | genus or family in Tree of Sex |
| *Pelodiscus_sinensis* | GSD | GSD | species in Tree of Sex |
| *Phelsuma_madagascariensis* | TSD II | TSD II | species in Tree of Sex; written as *Phelsuma madagascariensis grandis* |
| *Phrynosoma_cornutum* | GSD | GSD | genus or family in Tree of Sex |
| *Pituophis_melanoleucus* | GSD | GSD | genus or family in Tree of Sex |
| *Podarcis_bocagei* | GSD | GSD | genus or family in Tree of Sex |
| *Podarcis_hispanica* | GSD | GSD | species in Tree of Sex |
| *Podarcis_muralis* | GSD | GSD | genus or family in Tree of Sex |
| *Podarcis_sicula* | GSD | GSD | genus or family in Tree of Sex |
| *Podocnemis_erythrocephala* | TSD Ia | TSD Ia | species in Tree of Sex |
| *Podocnemis_expansa* | TSD Ia | TSD Ia | species in Tree of Sex |
| *Podocnemis_lewyana* | TSD Ia | TSD Ia | species in Tree of Sex |
| *Podocnemis_sextuberculata* | TSD Ia | TSD Ia | species in Tree of Sex |
| *Podocnemis_unifilis* | TSD Ia | TSD Ia | species in Tree of Sex |
| *Psammodromus_algirus* | GSD | GSD | species in Tree of Sex |
| *Pseudemys_concinna* | TSD Ia | TSD Ia | species in Tree of Sex |
| *Pseudemys_floridana* | TSD Ia | TSD Ia | species in Tree of Sex |
| *Pseudemys_nelsoni* | TSD Ia | TSD Ia | species in Tree of Sex |
| *Pseudemys_peninsularis* | TSD Ia | TSD Ia | species in Tree of Sex |
| *Rhabdophis_tigrinus* | GSD | GSD | species in Tree of Sex |
| *Sceloporus_graciosus* | GSD | GSD | species in Tree of Sex |
| *Sceloporus_jarrovi* | GSD | GSD | species in Tree of Sex |
| *Sceloporus_poinsetti* | GSD | GSD | species in Tree of Sex |
| *Sceloporus_scalaris* | GSD | GSD | species in Tree of Sex |
| *Sceloporus_undulatus* | GSD | GSD | species in Tree of Sex |
| *Sceloporus_virgatus* | GSD | GSD | genus or family in Tree of Sex |
| *Sistrurus_catenatus* | GSD | GSD | genus or family in Tree of Sex |
| *Sistrurus_miliarius* | GSD | GSD | genus or family in Tree of Sex |
| *Sphenodon_punctatus* | TSD Ib | TSD Ib | species in Tree of Sex |
| *Staurotypus_triporcatus* | GSD | GSD | species in Tree of Sex |
| *Stegonotus_cucullatus* | GSD | GSD | genus or family in Tree of Sex |
| *Sternotherus_carinatus* | TSD II | TSD II | species in Tree of Sex |
| *Sternotherus_minor* | TSD II | TSD II | species in Tree of Sex |
| *Sternotherus_odoratus* | TSD II | TSD II | species in Tree of Sex |
| *Storeria_dekayi* | GSD | GSD | species in Tree of Sex |
| *Tarentola_annularis* | TSD II | TSD II | species in Tree of Sex |
| *Tarentola_boettgeri* | TSD II | TSD II | species in Tree of Sex |
| *Tarentola_mauritanica* | TSD II | TSD II | species in Tree of Sex |
| *Terrapene_carolina* | TSD II | TSD II | species in Tree of Sex |
| *Terrapene_ornata* | TSD Ia | TSD Ia | species in Tree of Sex |
| *Testudo_graeca* | TSD Ia | TSD Ia | species in Tree of Sex |
| *Testudo_hermanni* | TSD Ia | TSD Ia | species in Tree of Sex; Written as *Eurotestudo hermanni* |
| *Thamnophis_marcianus* | GSD | GSD | species in Tree of Sex |
| *Thamnophis_proximus* | GSD | GSD | genus or family in Tree of Sex |
| *Thamnophis_radix* | GSD | GSD | genus or family in Tree of Sex |
| *Thamnophis_sauritus* | GSD | GSD | genus or family in Tree of Sex |
| *Thamnophis_scalaris* | GSD | GSD | genus or family in Tree of Sex |
| *Thamnophis_sirtalis* | GSD | GSD | genus or family in Tree of Sex |
| *Trachemys_adiutrix* | TSD Ia | NA | genus or family in Tree of Sex |
| *Trachemys_scripta* | TSD Ia | TSD Ia | species in Tree of Sex |
| *Trimeresurus_stejnegeri* | GSD | GSD | genus or family in Tree of Sex |
| *Tropidurus_albemarlensis* | GSD | GSD | genus or family in Tree of Sex |
| *Tropidurus_hispidus* | GSD | GSD | species in Tree of Sex |
| *Tropidurus_itambere* | GSD | GSD | genus or family in Tree of Sex |
| *Tropidurus_torquatus* | GSD | GSD | species in Tree of Sex |
| *Underwoodisaurus_milii* | GSD | GSD | Pokorn et al (2014) Cyogenetic and genome research |
| *Uta_stansburiana* | GSD | GSD | species in Tree of Sex |
| *Varanus_albigularis* | GSD | GSD | species in Tree of Sex |
| *Varanus_salvator* | GSD | GSD | species in Tree of Sex; In tree of sex, the reference cited actually says that the evidence is not convincing that Varanidae have TSD due to mis ID sex and no histological confirmation; keeping this as GSD due to this and GSD being in the rest of the genus |
| *Vipera_aspis* | GSD | GSD | species in Tree of Sex; written as *Vipera aspis aspis* |
| *Vipera_berus* | GSD | GSD | species in Tree of Sex |
| *Vipera_ursinii* | GSD | GSD | species in Tree of Sex |
| *Xenochrophis_piscator* | GSD | GSD | species in Tree of Sex |

**Figure S1**. A flowchart outlining the data collection and compilation process. Data originating from different sources are delineated in different columns with the steps of data filtering broken down by row. There are three main columns to show the three main sources of colour-coded data: Bokony *et al.* 2018 (green), ROSIE (2021, v1.0.0; orange), and personal communications (purple). Under each heading, the data screening done by each author is shown in the left-most subsection of the column labelled as the ‘[source] process’ (i.e., for Bokony *et al.* 2018, the subsection is Bokony process). The further filtering conducted for this project is shown in the right-most subsection entitled ‘Terebiznik filtering’ (yellow). The section for personal communication lacks this structure as I conducted all the filtering. The data filtering process is shown in three main steps: ‘Identification’ describes how sources conducted their literature search; ‘Screening by Author’ describes what criteria authors used to filter the identified sources for their data base; and ‘Included’ summarizes the sample size for the data that remained in the resource after the screening was complete. The row section for ‘Terebiznik dataset’ describes how the structure of the data for each source was modified and standardized in the ‘Modified’ subsection. The total summary of records in the database used for this thesis is in the last subsection of ‘Included’.


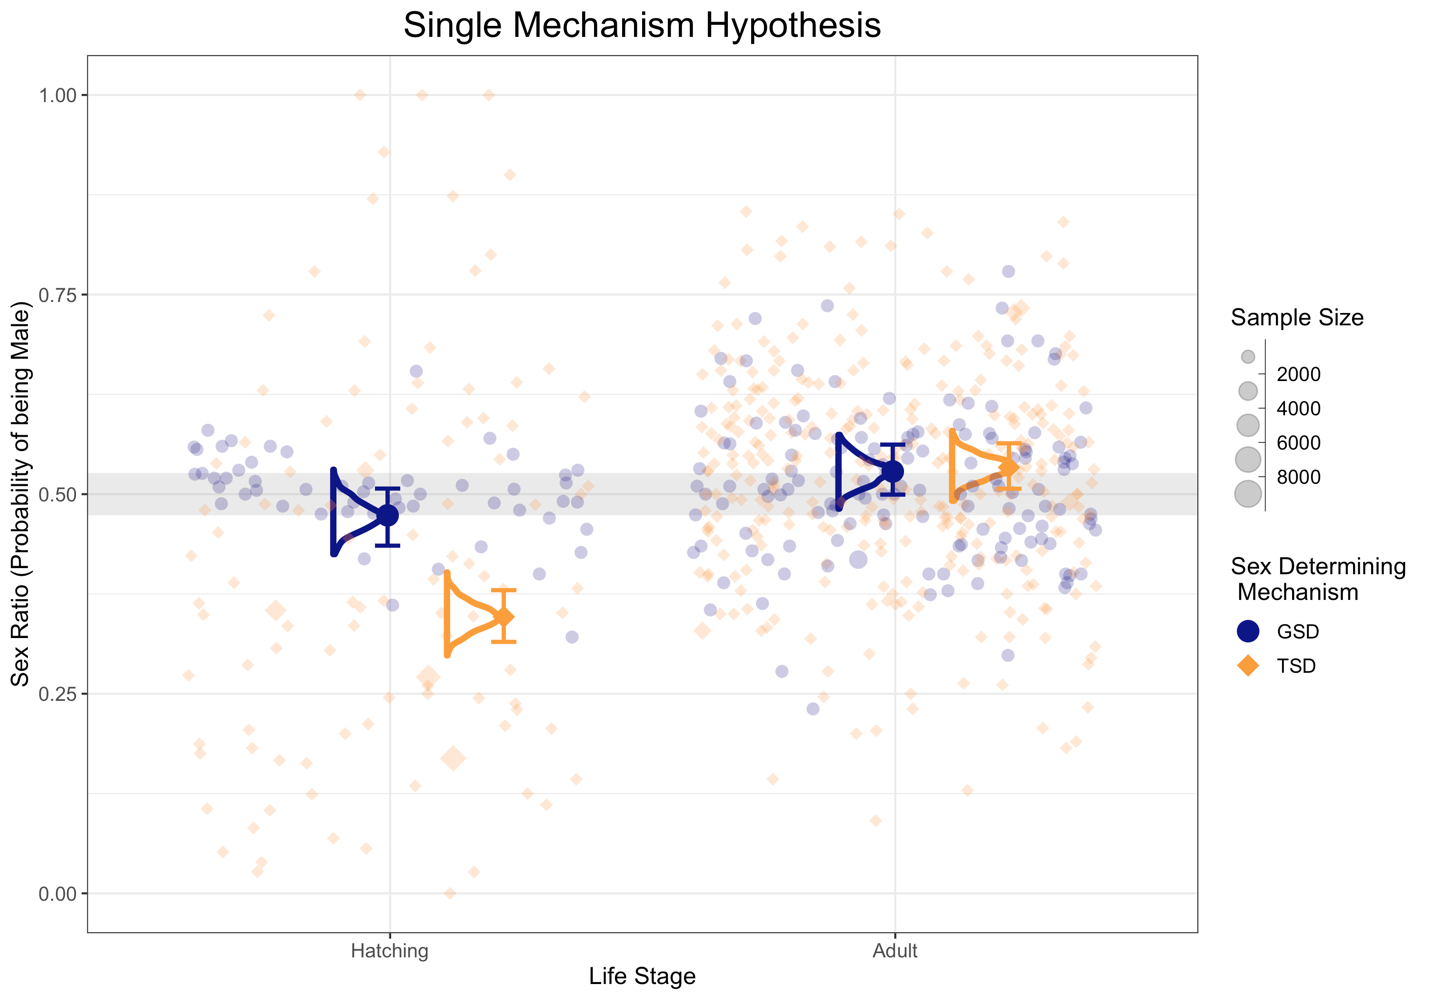


**Figure S2**. The results of the Single Mechanistic Hypothesis model shown as the posterior distributions of sex ratio (probability of being male) across life stage of hatching and adulthood for TSD and GSD species. Posterior distributions are graphed with the point estimate ± 95% credible intervals. The raw sex ratio data (proportion male) inputted into the model are graphed in the translucent points with blue circles for TSD records and orange rhombuses for GSD data points. The raw data size is proportional to the sample size and are placed staggered around their corresponding life stage to avoid clutter.


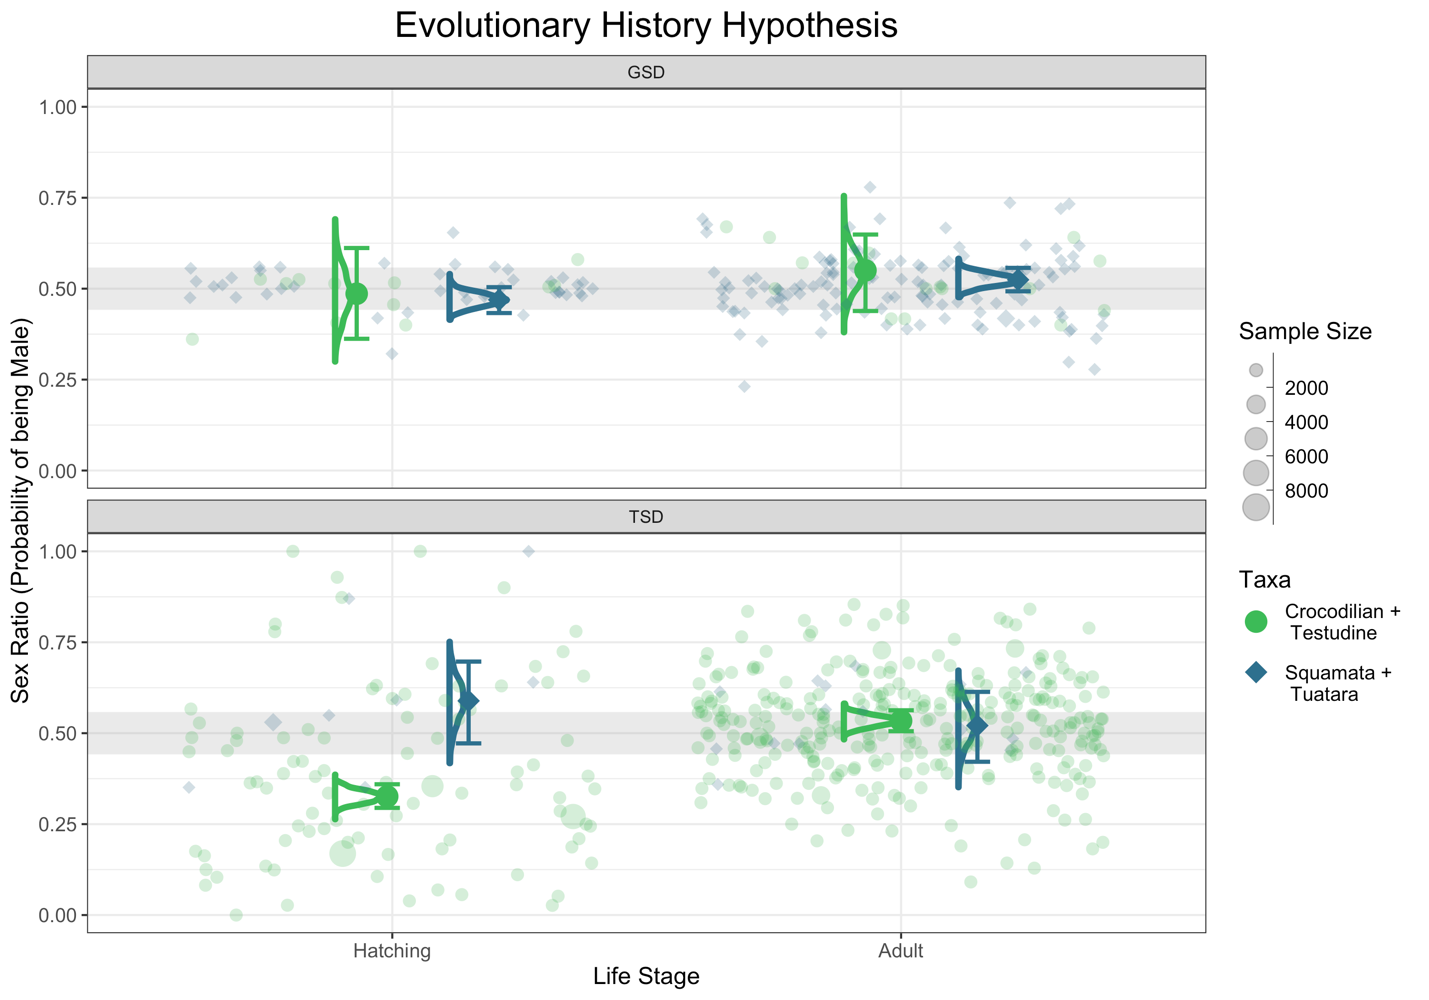


**Figure S3**.The results of the Evolutionary History Hypothesis model shown as the posterior distributions of sex ratio (probability of being male) across life stage of hatching and adulthood for each taxa. Posterior distributions are graphed with the point estimate ±95% credible intervals. The raw sex ratio data (proportion male) inputted into the model are graphed in the translucent points with green circles for the Crocodilian + Testudine records and blue rhombuses for Squamata + Tuatara data points. The raw data size is proportional to the sample size and are placed staggered around their corresponding life stage to avoid clutter. The data results are separated by sex determining mechanism, with GSD species shown in the top panel and TSD species in the bottom panel.


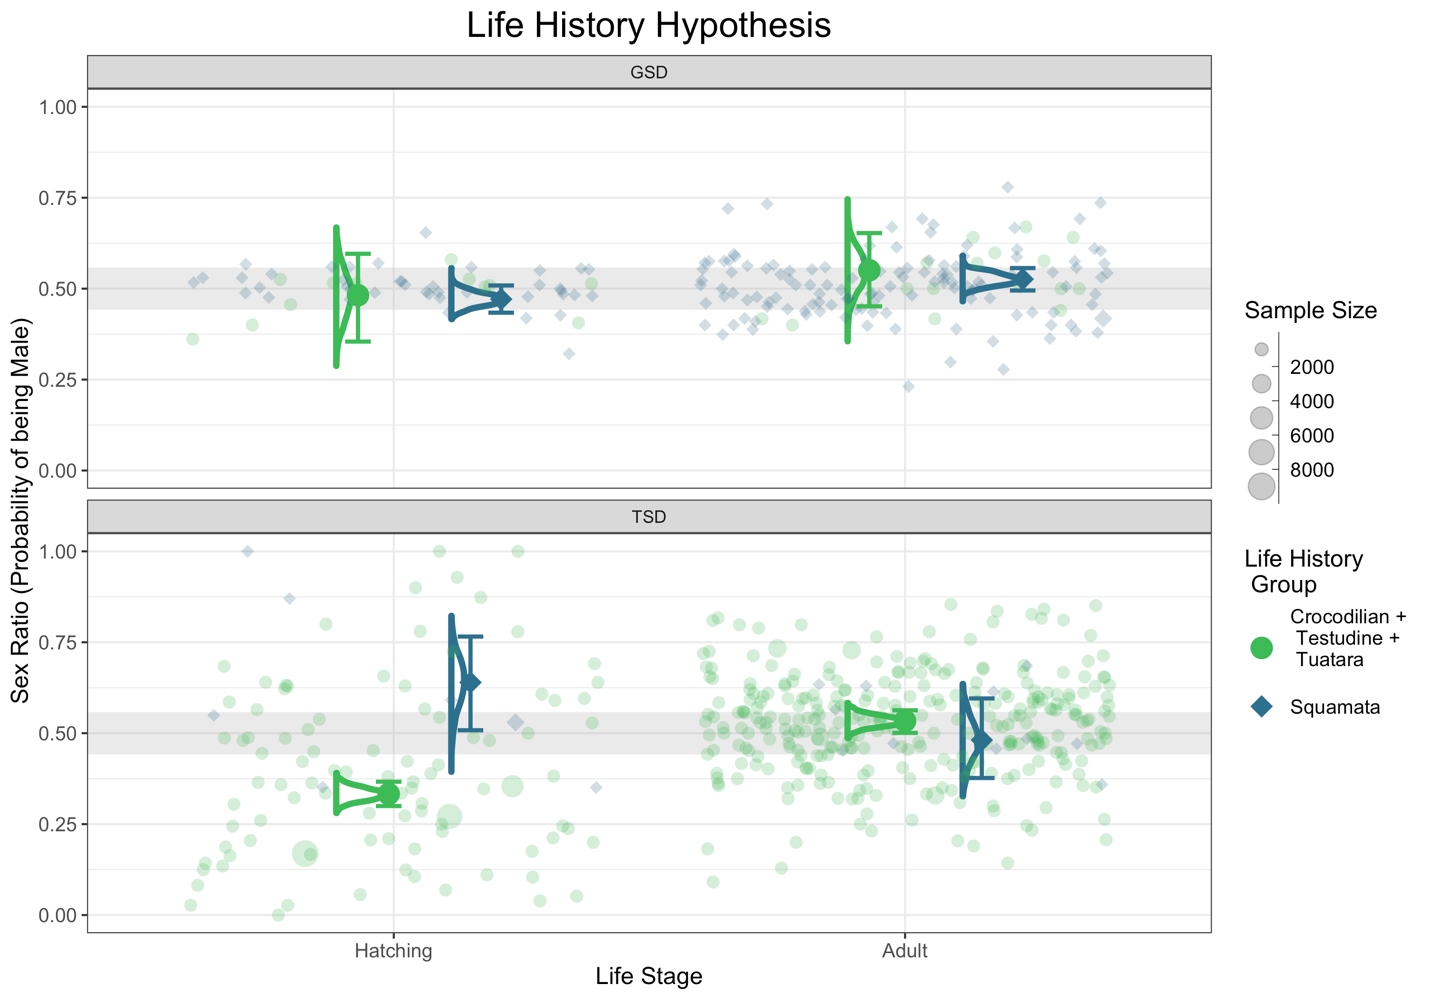


**Figure S4**. The results of the Life History Hypothesis model shown as the posterior distributions of sex ratio (probability of being male) across life stage of hatching and adulthood for each taxa. Posterior distributions are graphed with the point estimate ±95% credible intervals. The raw sex ratio data (proportion male) inputted into the model are graphed in the translucent points with green circles for the Crocodilian + Testudine + Tuatara records and blue rhombuses for Squamata data points. The raw data size is proportional to the sample size and are placed staggered around their corresponding life stage to avoid clutter. The data results are separated by sex determining mechanism, with GSD species shown in the top panel and TSD species in the bottom panel.


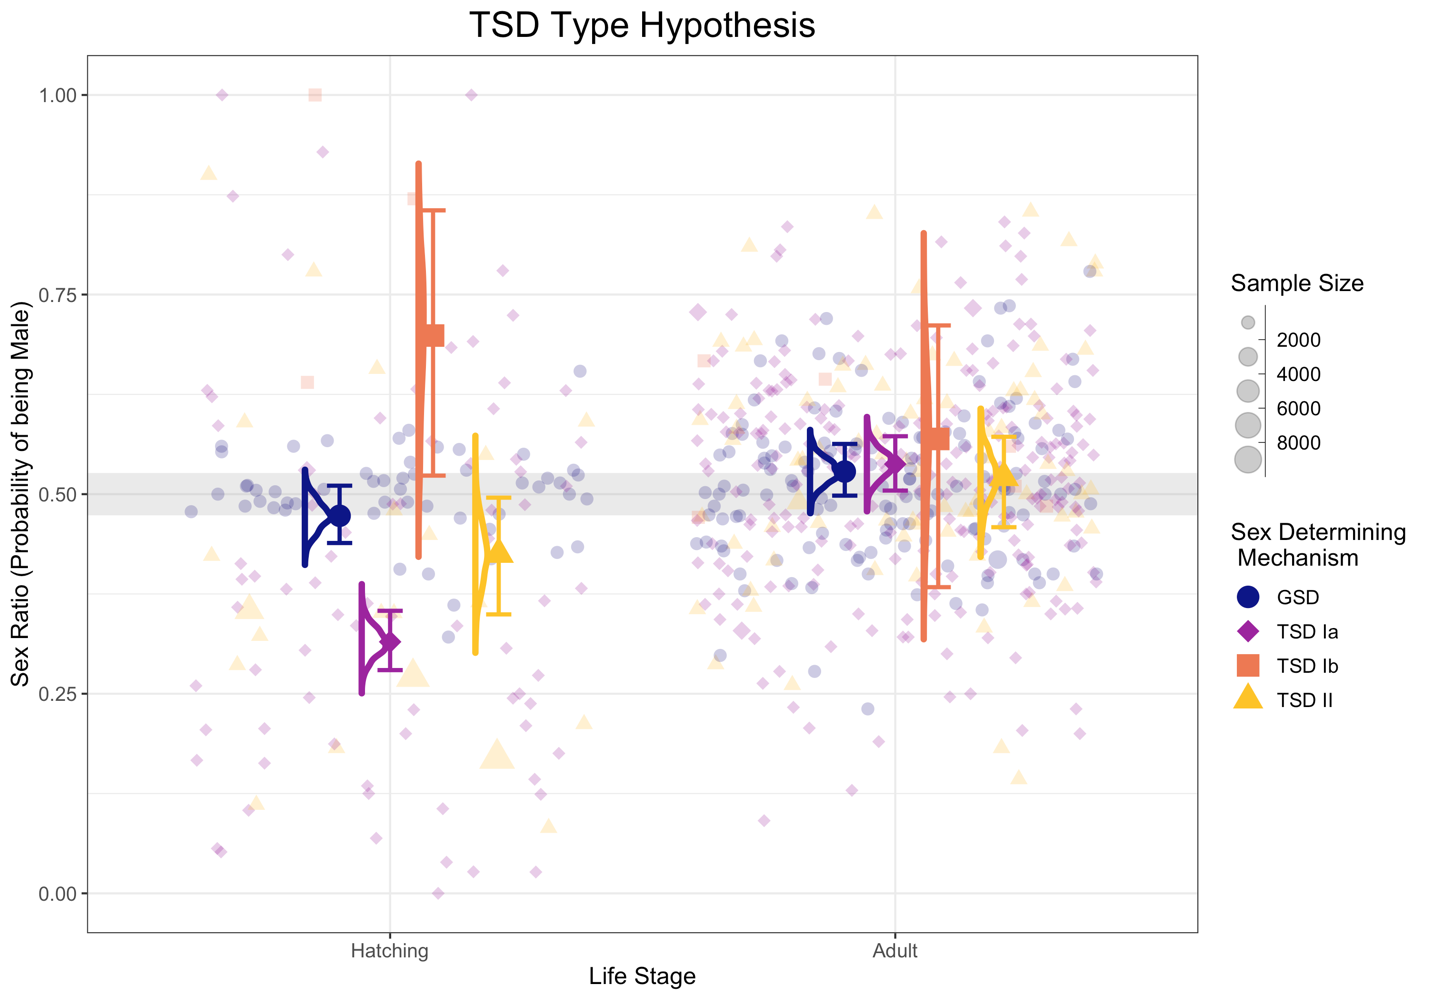


**Figure S5**. The results of the TSD Type Hypothesis model shown as posterior distributions of sex ratio (probability of being male) across life stage of hatching and adulthood for TSD Ia, TSD Ib, TSD II, and GSD species. Posterior distributions are graphed with the point estimate ± 95% credible interval. The raw sex ratio data (proportion male) inputted in the model are graphed in the translucent points with purple rhombuses for TSD Ia, orange squares for TSD Ib, yellow triangles for TSD II, and blue circles for GSD. The raw data size is proportional to the sample size and are placed staggered around their corresponding life stage to avoid clutter.

**Note on the discussion of sex in this paper**

In this paper, we discuss sex, sex determination, and attributed characteristics and behaviours of each sex. We use the term ‘sex’ here in the strict biological binary of male and female, defined by whether an individual produces fewer more valuable gametes (eggs, seeds) for female, or more abundant, less valuable gametes (sperm, pollen) for males. Individuals’ sex is identified in the studies cited and data used in this thesis by morphological characteristics of sexual dimorphic traits or gonadal examination.

We recognize that this definition does not encapsulate the full spectrum of sex/gender and fails to represent the broad diversity on gender views and identity in humans, as well as biological life in general. We therefore want to emphatically state that the theoretical mechanisms and data interpretations conducted in my thesis are not meant to comment on or contribute to cultural discussions of human views of gender, gender identity, sexuality, etc. To apply these theories to the human condition is not only biologically incorrect, as their underlying assumptions to do not apply to *Homo sapiens*, it is also extremely reductive to the complexities of human culture and behaviour.

**Note on the citing of sources**

Throughout this paper, we cite authors like Ronald A. Fisher, being active members and vocal proponents of eugenics. We are required to cite their works, often published with concurrent eugenic texts. We cite these articles out of a scientific obligation to reference those whose ideas and work one is using in their research. Due to the intrinsic nature of eugenic ideologies within evolutionary theory, we are unable to separate to relevant sex ratio theory from the eugenic text that accompanies it and the eugenic-supporting authors who wrote them. In the face of this truth, the best we can do is openly acknowledge this history and place these texts in much needed context.
